# Supplementary material
Source: Frontiers journal article supplement (https://www.frontiersin.org/articles/433522)
Supplement: Data_Sheet_1.docx [file Data_Sheet_1.docx]

**Supplementary Appendices**

Appendix A: Supplementary Table 1. Definitions used for phases of depression

Appendix B: Patient questionnaire

Appendix C: HCP questionnaire

Appendix D:

- Supplementary Fig. 1. Mean FAST score for each domain by patient cohort
- Supplementary Fig. 2. Mean FAST score for each domain by HCP-assessed cohort
